# Supplementary material
Source: MDPI journal article supplement (https://www.mdpi.com/2079-6412/13/7/1282)
Supplement: s1 [file s1]

# Supplementary Material

## Self-Healing Redox-Active Coatings Based on Ferrocenyl-Containing Polysiloxanes ‡

Artem A. Rashevskii<sup>†</sup>, Konstantin V. Deriabin<sup>†</sup>, Elizaveta K. Parshina and Regina M. Islamova<sup>\*</sup>

Institute of Chemistry, St. Petersburg University, 7/9 Universitetskaya Emb., St. Petersburg 199034, Russia.

<sup>\*</sup> Correspondence: [r.islamova@spbu.ru](mailto:r.islamova@spbu.ru) (R.M.I.).

<sup>†</sup> These authors contributed equally.

<sup>‡</sup> In commemoration of the 300th anniversary of St Petersburg State University's founding.

### Content

|                                                   |    |
|---------------------------------------------------|----|
| S1. NMR and HRMS spectra.....                     | S2 |
| S2. Swelling and tensile properties of MSRs.....  | S5 |
| S3. Self-healing properties of FSRs and MSRs..... | S6 |
| S4. Thermal properties of MSRs .....              | S7 |

## S1. NMR and HRMS spectra

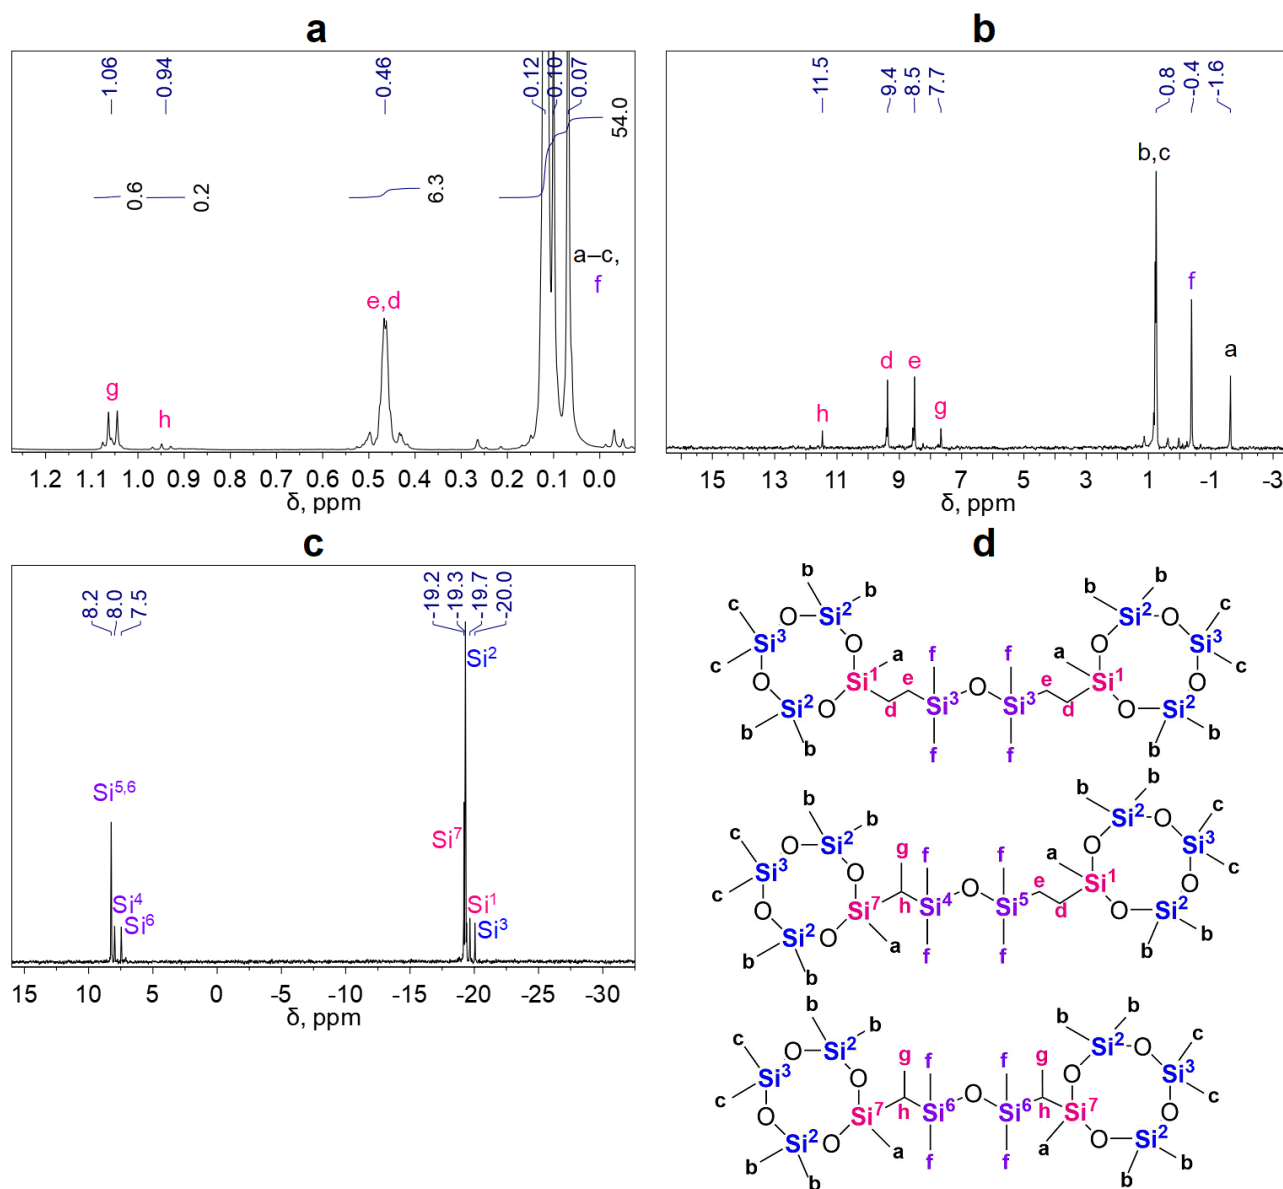

**Figure S1.** <sup>1</sup>H (a), <sup>13</sup>C (b), and <sup>29</sup>Si NMR spectra (c) of *bis*-D<sub>4</sub> and its isomers (d).

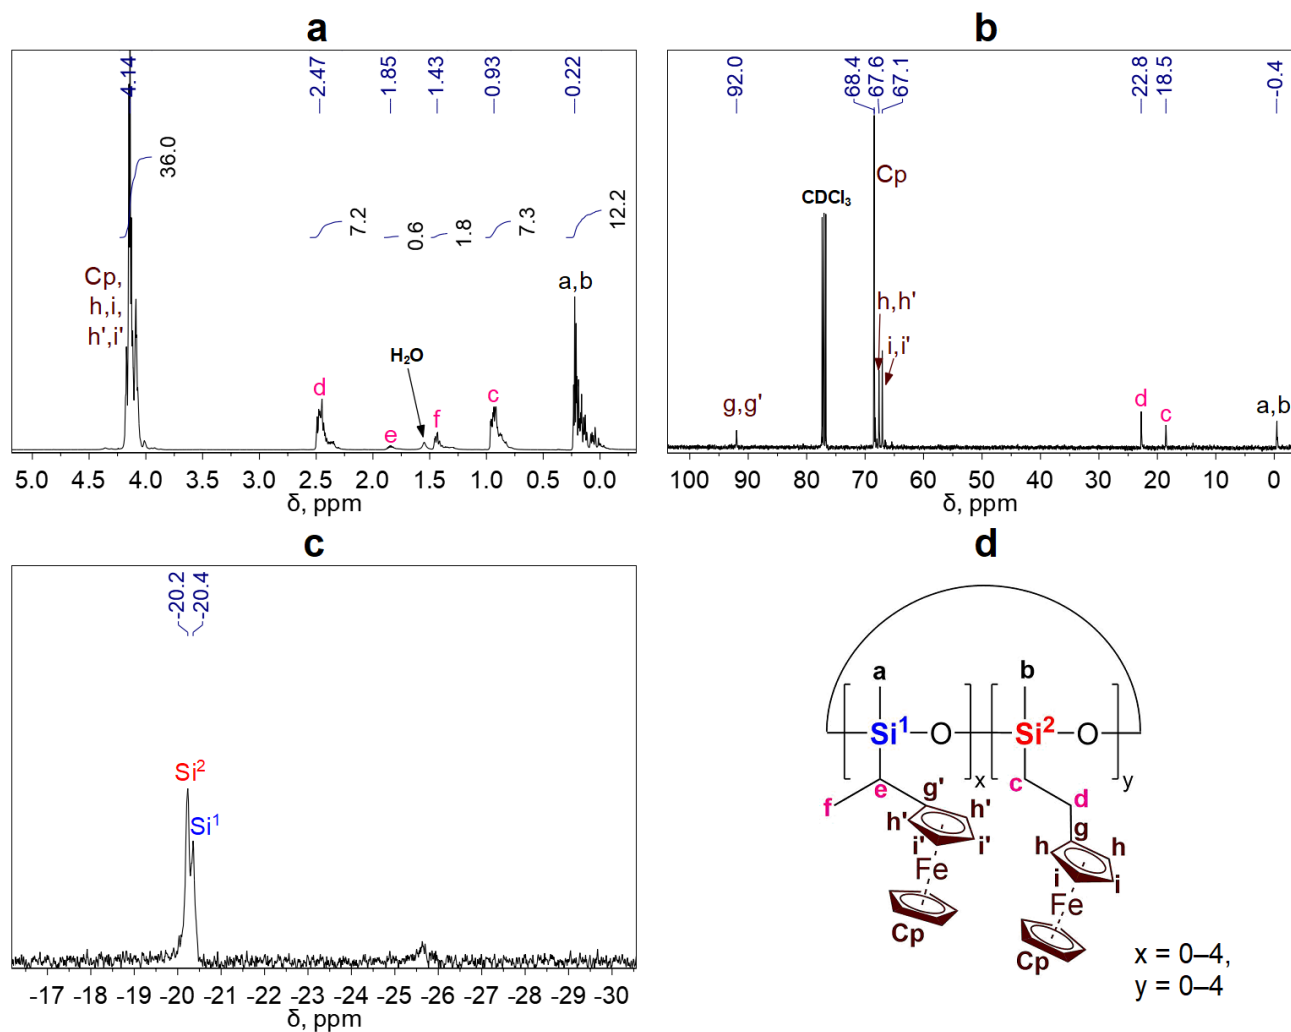

**Figure S2.**  $^1\text{H}$  (a),  $^{13}\text{C}$  (b), and  $^{29}\text{Si}$  NMR spectra (c) of  $\text{Fc}_4\text{D}_4$  and its general structure (d).

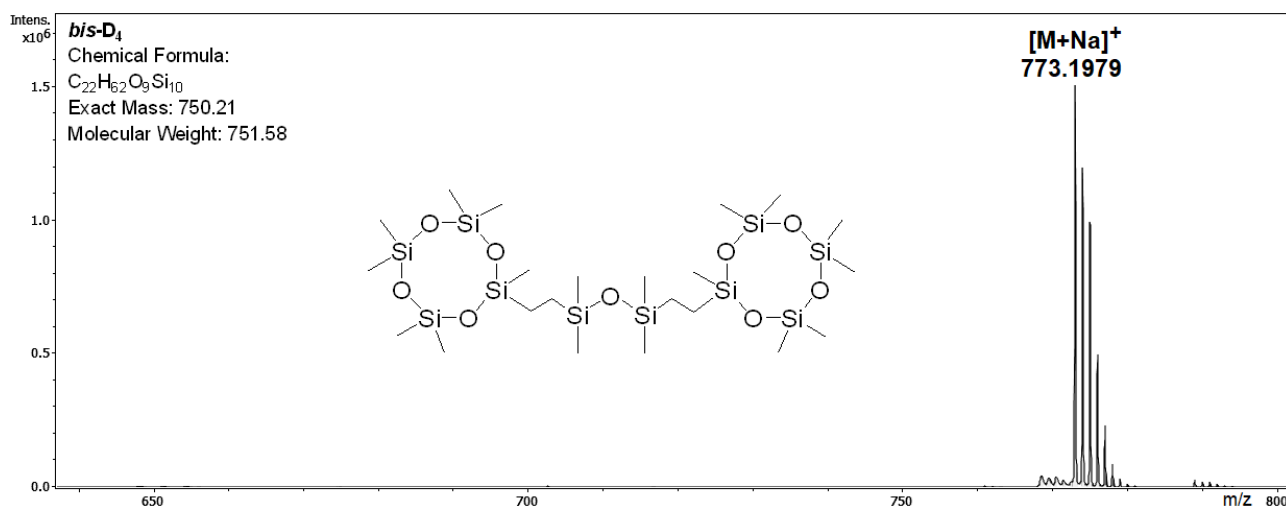

**Figure S3.** HRMS spectrum of *bis-D<sub>4</sub>*.

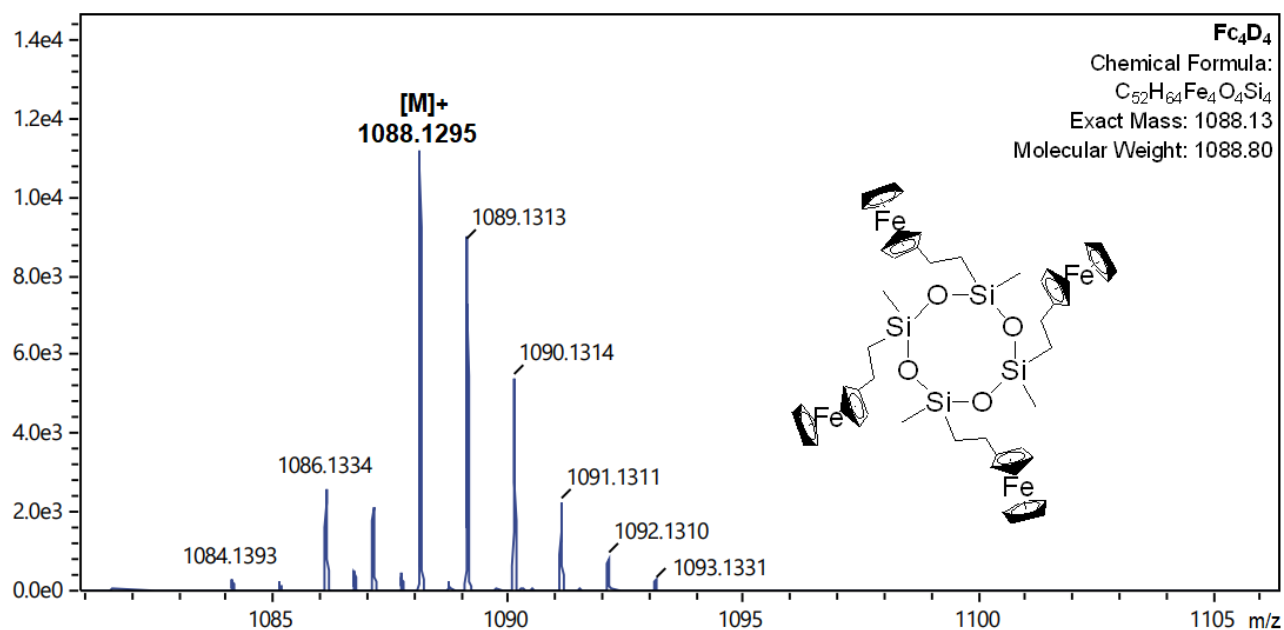

**Figure S4.** HRMS spectrum of  $\text{Fc}_4\text{D}_4$ .

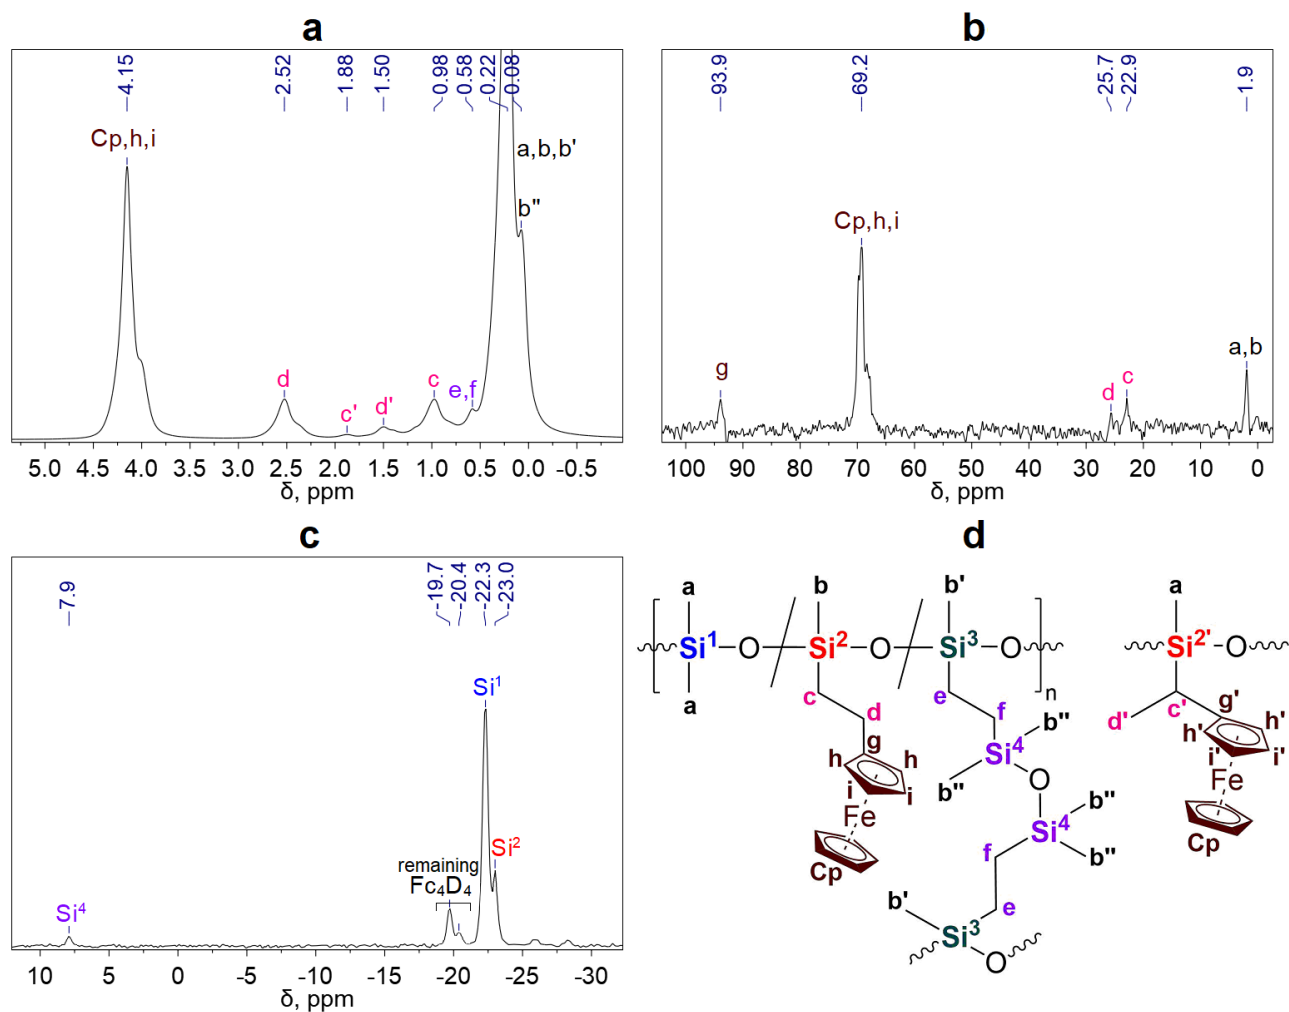

**Figure S5.**  $^1\text{H}$  (a),  $^{13}\text{C}$  (b), and  $^{29}\text{Si}$  SSNMR spectra (c) of FSR25 and the fragment of its 3D polymer network (d).

## S2. Swelling and tensile properties of MSRs

The cross-linking degree of the model silicone rubbers (with *bis*-D<sub>4</sub> concentrations of 0.5, 0.75, and 1.0 wt.%) was estimated by swelling measurements as in the case of FSRs. As expected (Table S1), the soluble fraction ( $\omega_{sol}$ ) decreases and the gel fraction rises with an increase in the concentration of the *bis*-D<sub>4</sub> cross-linking agent (due to an increase in the number of cross-links in the 3D polymer network). The  $M_c$  parameter (the "distance" between the cross-links) declines in the PDMS*bis*D<sub>4</sub>-0.5%–PDMS*bis*D<sub>4</sub>-0.75%–PDMS*bis*D<sub>4</sub>-1.0% series.

**Table S1.** Swelling and tensile properties of the MSRs.

| Silicone rubber                       | $\rho_p, \text{g}\cdot\text{mL}^{-1}$ | Swelling properties |                    |           |       | Tensile properties   |                |
|---------------------------------------|---------------------------------------|---------------------|--------------------|-----------|-------|----------------------|----------------|
|                                       |                                       | $s, \%$             | $\omega_{sol}, \%$ | $\nu$     | $M_c$ | $\sigma, \text{MPa}$ | $\epsilon, \%$ |
| PDMS <i>bis</i> D <sub>4</sub> -0.5%  | 1.00±0.03                             | 450±40              | 43±7               | 0.15±0.04 | 32300 | 0.10±0.02            | 1600±200       |
| PDMS <i>bis</i> D <sub>4</sub> -0.75% | 1.01±0.03                             | 570±50              | 11±2               | 0.18±0.05 | 15500 | 0.15±0.04            | 300±40         |
| PDMS <i>bis</i> D <sub>4</sub> -1.0%  | 1.01±0.03                             | 570±50              | 7±2                | 0.19±0.05 | 14100 | 0.16±0.02            | 220±20         |

It can be seen from the mechanical properties presented in the Table S1, the MSR with the lowest cross-linking degree is the most stretchable ( $\epsilon = 1600\%$ ), while the least robust ( $\sigma = 0.10 \text{ MPa}$ ). With an increase in the concentration of *bis*-D<sub>4</sub>, the tensile strength ( $\sigma$ ) rises with a decrease in the elongation at break ( $\epsilon$ ) in the PDMS*bis*D<sub>4</sub>-0.5%–PDMS*bis*D<sub>4</sub>-0.75%–PDMS*bis*D<sub>4</sub>-1.0% series.

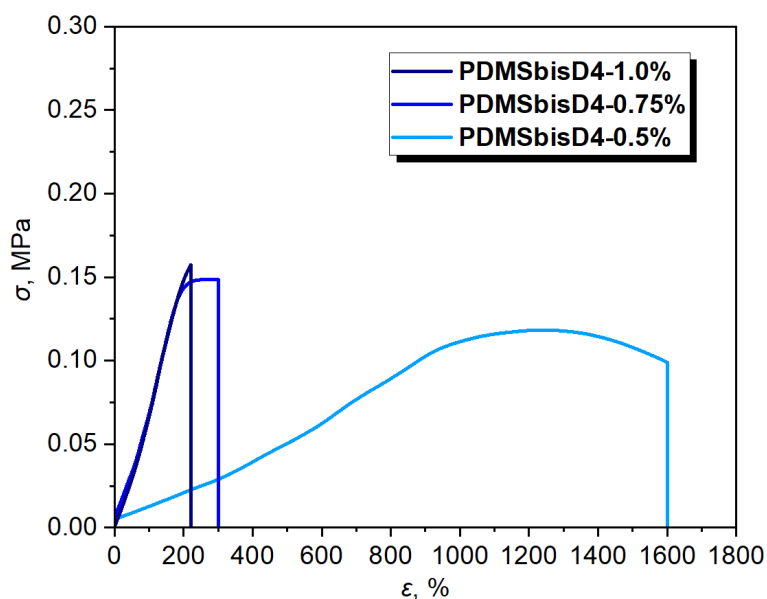

**Figure S6.** Stress–strain curves of the MSRs at a stretching speed of 40 mm·min<sup>−1</sup>.

### S3. Self-healing properties of FSRs and MSRs

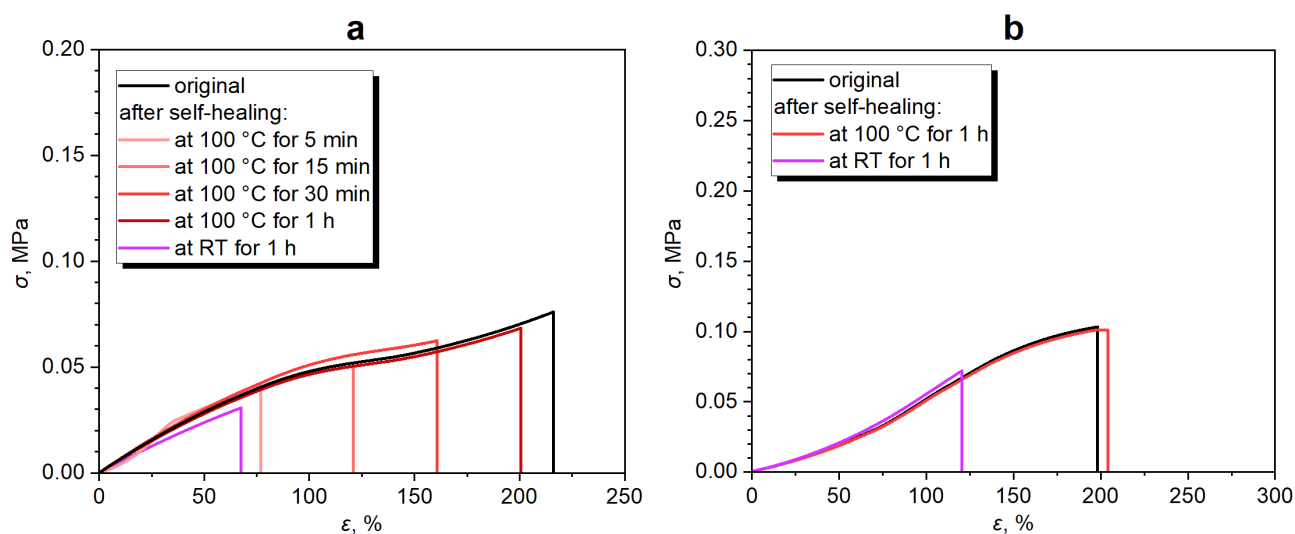

**Figure S7.** Stress–strain curves of the original and healed FSR25 (a) and FSR50 (b) at a stretching speed of 40 mm·min<sup>-1</sup>.

The self-healing efficiency of MSRs was estimated after 24 h at RT and 100 °C after 15 min. The maximum value of  $\eta$  parameter is observed in the sample with the lowest cross-linking degree (PDMSbisD<sub>4</sub>-0.5%) and reaches 90% at RT. The self-healing ability and  $\eta$  parameter sharply drop down to 0% in the PDMSbisD<sub>4</sub>-0.5%–PDMSbisD<sub>4</sub>-0.75%–PDMSbisD<sub>4</sub>-1.0% series (Table S2, Figure S8). It can be concluded that an increase in the concentration of *bis*-D<sub>4</sub> negatively affects the self-healing of samples.

**Table S2.** Self-healing properties of the MSRs.

| Silicone rubber              | Healing temperature, °C | Healing time | $\eta$ , % |
|------------------------------|-------------------------|--------------|------------|
| PDMSbisD <sub>4</sub> -0.5%  | RT                      | 24 h         | 90         |
|                              | 100                     | 15 min       | 100        |
| PDMSbisD <sub>4</sub> -0.75% | RT                      | 24 h         | 15         |
| PDMSbisD <sub>4</sub> -1.0%  | RT                      | 24 h         | 0          |

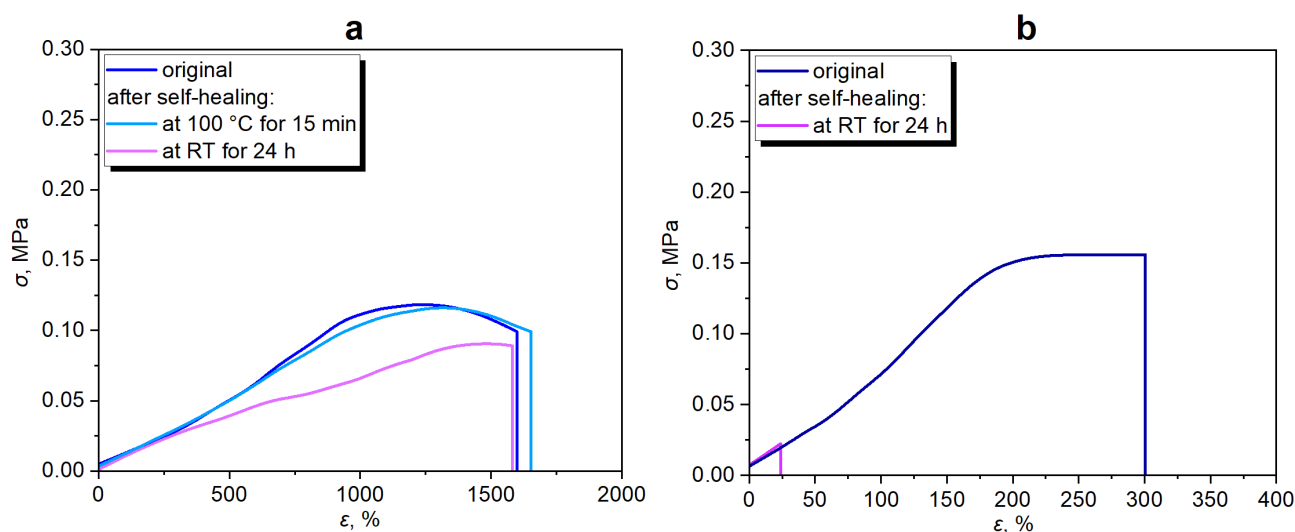

**Figure S8.** Stress–strain curves of the original and healed MSRs: PDMSbisD<sub>4</sub>-0.5% (a) and PDMSbisD<sub>4</sub>-0.75% (b) at a stretching speed of 40 mm·min<sup>-1</sup>.

#### S4. Thermal properties of MSRs

In the case of self-healing MSRs (PDMSbisD<sub>4</sub>-0.5%) (Figure S9), there is an endothermic peak (30.22 J·g<sup>-1</sup>) at -39 °C, corresponding to melting, and an exothermic peak (-27.97 J·g<sup>-1</sup>) at -77 °C, corresponding to crystallization. At the same time, the  $T_g$  of the polymer is approximately -128 °C, which is similar to pure polydimethylsiloxane.

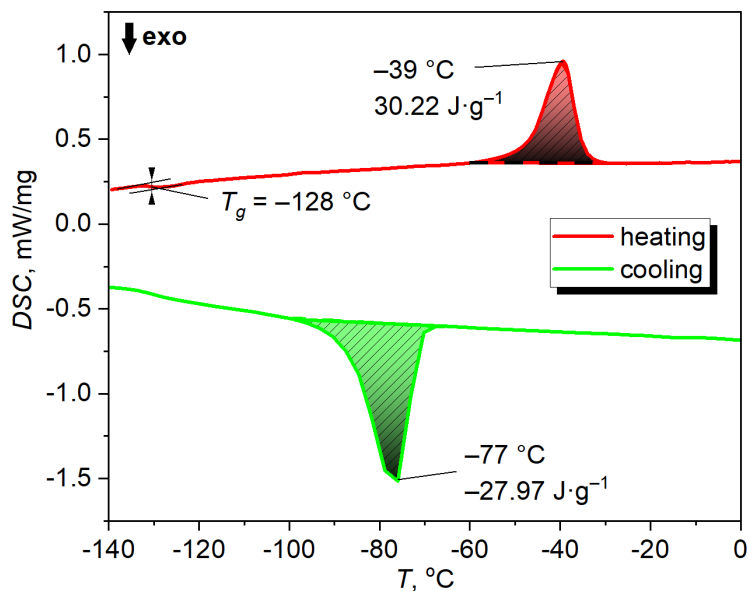

**Figure S9.** DSC curves for PDMSbisD<sub>4</sub>-0.5% from -140 to 0 °C.
